# Supplementary material for: Microbiota stability in healthy individuals after single-dose lactulose challenge—A randomized controlled study
Source: PubMed Central journal article supplement (PMC6201941; doi:10.1371/journal.pone.0206214), 2018-10-25

A

| Order             | Family             | Genus                         | Species                 |
|-------------------|--------------------|-------------------------------|-------------------------|
| Enterobacteriales | Enterobacteriaceae | <i>Escherichia-Shigella</i>   | <i>Escherichia coli</i> |
| Enterobacteriales | Enterobacteriaceae | Unknown                       | Unknown                 |
| Enterobacteriales | Enterobacteriaceae | <i>Hafnia-Obesumbacterium</i> | Unknown                 |
| Enterobacteriales | Enterobacteriaceae | <i>Raoultella</i>             | Unknown                 |
| Enterobacteriales | Enterobacteriaceae | <i>Proteus</i>                | <i>Proteus</i>          |
| Enterobacteriales | Enterobacteriaceae | <i>Yersinia</i>               | <i>Yersinia</i>         |

B

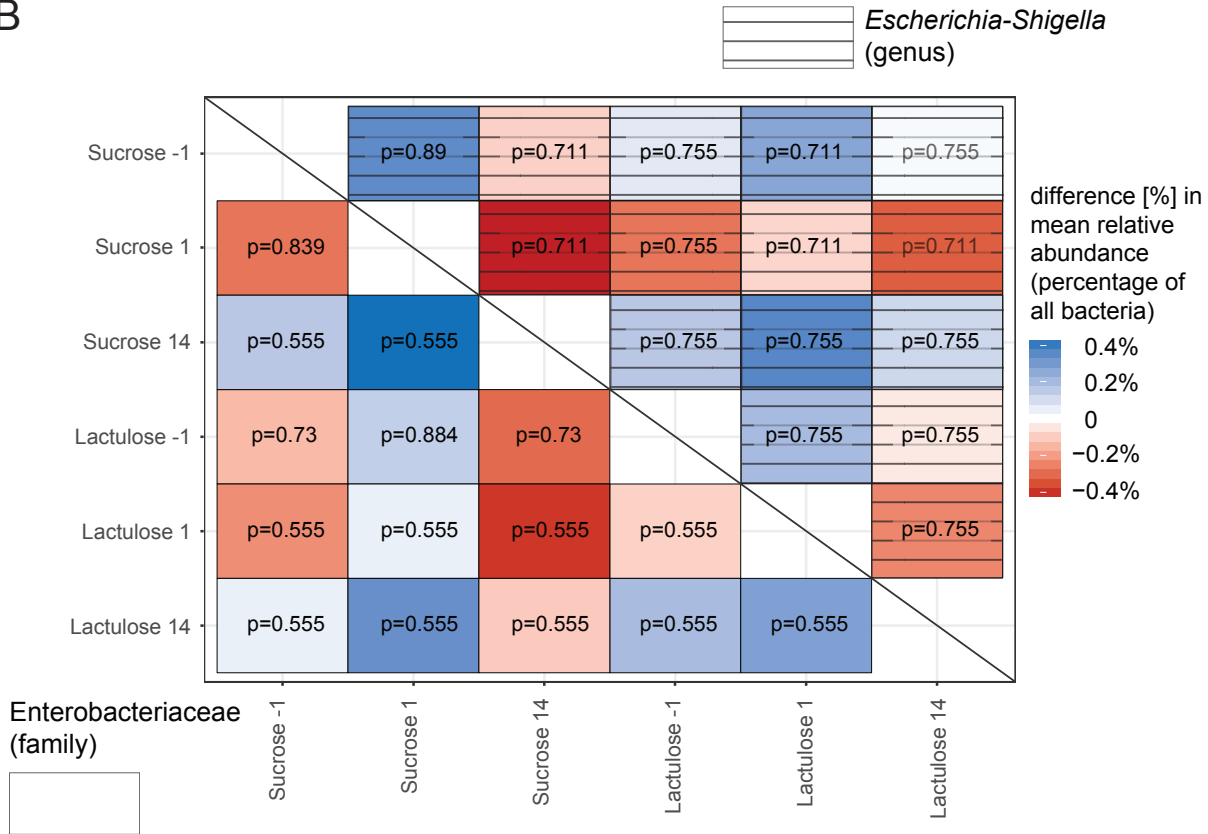

Supplement: pone.0206214.s004.pdf [file pone.0206214.s004.pdf]
